# Supplementary material for: Association of Fortification with Human Milk versus Bovine Milk-Based Fortifiers on Short-Term Outcomes in Preterm Infants—A Meta-Analysis
Source: MDPI journal article supplement (doi:10.3390/nu16060910), 2024-03-21
Supplement: s1 [file s1]

|       |                                  | Risk of bias domains                                                                                                                                                                                                                                        |    |    |    |    |                                   |
|-------|----------------------------------|-------------------------------------------------------------------------------------------------------------------------------------------------------------------------------------------------------------------------------------------------------------|----|----|----|----|-----------------------------------|
|       |                                  | D1                                                                                                                                                                                                                                                          | D2 | D3 | D4 | D5 | Overall                           |
| Study | O'Connor DL 2018 - OptiMoM trial |                                                                                                                                                                                                                                                             |    |    |    |    |                                   |
|       | Sullivan 2010 (Lucas A 2019)     |                                                                                                                                                                                                                                                             |    |    |    |    |                                   |
|       | Jensen 2023                      |                                                                                                                                                                                                                                                             |    |    |    |    |                                   |
|       |                                  | Domains:<br>D1: Bias arising from the randomization process.<br>D2: Bias due to deviations from intended intervention.<br>D3: Bias due to missing outcome data.<br>D4: Bias in measurement of the outcome.<br>D5: Bias in selection of the reported result. |    |    |    |    | Judgement<br>Some concerns<br>Low |

**Figure S1:** Risk of Bias (RoB) [1–3].

**Supplementary File S1:** Search strategy—Effects of exclusively using human milk with HMFs versus BMFs

Search performed on: 31.08.2023

PubMed:

((((( "Infant, Newborn"[Mesh] OR "Infant, Extremely Premature"[Mesh] OR "Infant, Premature"[Mesh] OR "Infant, Very Low Birth Weight"[Mesh] OR "Gestational Age"[Mesh] OR "Infant, Extremely Low Birth Weight"[Mesh] OR neonat\*[tiab] OR infant\*[tiab] OR newborn\*[tiab] OR gestation\*[tiab] OR "pre-term"[tiab] OR "birth weight"[tiab] OR neonat\*[OT] OR infant\*[OT] OR newborn\*[OT] OR gestation\*[OT] OR "pre-term"[OT] OR "birth weight"[OT])) AND ((( "Infant Formula"[Mesh] OR "Milk, Human"[Mesh] OR "Breast Feeding"[Mesh:NoExp] OR "Milk"[Mesh:NoExp] OR "Food, Fortified"[Mesh] OR "Milk Banks"[Mesh] OR milk[tiab] OR formula[tiab] OR feeding[tiab] OR Milk[OT] OR formula[OT] OR feeding[OT])) AND ((fortif\*[tiab] OR exclusiv\*[tiab] OR predominant\*[tiab] OR supplement\*[tiab] OR fortif\*[OT] OR exclusiv\*[OT] OR predominant\*[OT] OR supplement\*[OT])) AND (( "Enterocolitis, Necrotizing"[Mesh] OR "Retinopathy of Prematurity"[Mesh] OR "Bronchopulmonary Dysplasia"[Mesh] OR "Mortality"[Mesh] OR "Infant Mortality"[Mesh] OR "Morbidity"[Mesh] OR "necrotizing enterocolitis"[tiab] OR "necrotising enterocolitis"[tiab] OR NEC[tiab] OR "retinopathy of prematurity"[tiab] OR "bronchopulmonary dysplasia"[tiab] OR "Mortality"[tiab] OR "Morbidity"[tiab] OR "necrotizing enterocolitis"[OT] OR "necrotising enterocolitis"[OT] OR NEC[OT] OR "retinopathy of prematurity"[OT] OR "bronchopulmonary dysplasia"[OT] OR "Mortality"[OT] OR "Morbidity"[OT]))))

Filters: from 2015–2023

PubMed: English: 1413, All languages: 1449

**Table S1:** Baseline characteristics comparing infants fed human milk vs bovine milk-derived fortifier

| Parameter                             | HM-HMF             | HM-BMF             |
|---------------------------------------|--------------------|--------------------|
| <b>Jensen et. al- NORDIC [1]</b>      |                    |                    |
| Number of subjects                    | 115                | 113                |
| Sex (female)                          | 54/115             | 52/113             |
| Chorioamnionitis                      | 27/115             | 16/113             |
| Apgar at 5 min                        | 7 (median IQR 5-8) | 7 (median IQR 5-8) |
| Gestation (weeks)                     | 25.5 (SD 1.5)      | 25.7 (SD 1.6)      |
| Birthweight (grams)                   | 793 (SD 212)       | 787 (SD 207)       |
| <b>OptiMoM trial [2]</b>              |                    |                    |
| Number of subjects                    | 64                 | 63                 |
| Sex (female)                          | 39/64              | 34/63              |
| Race (non-European)                   | 37/64              | 44/63              |
| Antenatal steroids                    | 56/64              | 56/63              |
| Apgar at 5 min                        | 7.4 (SD 2.1)       | 7.3 (SD 2.3)       |
| Gestation (weeks)                     | 27.9 (SD 2.7)      | 27.5 (SD 2.3)      |
| Birthweight (grams)                   | 887 (SD 208)       | 889 (SD 196)       |
| SGA at birth                          | 13/64 (20%)        | 16/63 (25%)        |
| <b>Sullivan trial re-analysis [3]</b> |                    |                    |
| Number of subjects                    | 82                 | 32                 |
| Sex(female)                           | 47/82 (57.3%)      | 15/32 (46.9%)      |
| Race (black)                          | 16/82 (19.5%)      | 3/32 (9.4%)        |
| Antenatal steroids                    | 15/82 (18.3%)      | 6/32 (18.8%)       |
| Apgar <7                              | 8/82 (9.8%)        | 6/32 (18.8%)       |
| Gestation (weeks)                     | 27.3 ± 2.2         | 27.1 ± 1.8         |
| Birthweight (grams)                   | 937 ± 199          | 938 ± 190          |
| SGA at birth                          | 10/82 (12.2%)      | 3/32 (9.4%)        |
| <b>Assad study re-analysis [4]</b>    |                    |                    |
| Number of subjects                    | 87                 | 127                |
| Sex (female)                          | 34/87 (39%)        | 64/127 (50%)       |
| Race (black)                          | 53 (61%)           | 85/127 (67%)       |
| Gestation (weeks)                     | 27.7 (SD 2.7)      | 28.3 (SD 2.8)      |

HM-HMF: Human milk with human milk fortifier; HM-BMF: Human milk with bovine milk fortifier; SGA: Small for gestational age;

**Table S2:** Outcomes comparing infants fed human milk vs. bovine milk-derived fortifier

| Parameter                                    | HM-HMF               | HM-BMF               | RR  | P-value |
|----------------------------------------------|----------------------|----------------------|-----|---------|
| Total number subjects                        | 348                  | 333                  |     |         |
| <b>Jensen et al.- NORDIC [1]</b>             |                      |                      |     |         |
| Number of subjects                           | 115                  | 113                  |     |         |
| NEC (Bell stage II-III)                      | 8 (7%)               | 9 (8%)               | 1.1 | 0.77    |
| NEC surgical                                 | 4 (4%)               | 4 (4%)               | 1   | 1.00    |
| Death                                        | 7 (6%)               | 13 (12%)             | 2   | 0.15    |
| Culture-proven sepsis                        | 33 (29%)             | 28 (25%)             | 0.9 | 0.50    |
| BPD                                          | 60/108 (56%)         | 66/102 (65%)         | 1.2 | 0.18    |
| ROP III-V                                    | 29/113 (26%)         | 25/110 (23%)         | 0.9 | 0.61    |
| Mortality and morbidity index (MMI)          | 78 (68%)             | 85 (75%)             | 1.1 | 0.22    |
| Time full enteral feeds, days                | 10 (median IQR 8-15) | 10 (median IQR 8-13) |     | 0.27    |
| <b>OptiMoM trial [2]</b>                     |                      |                      |     |         |
| Number of subjects                           | 64                   | 61                   |     |         |
| ROP (severe)                                 | 1/62 (1.6%)          | 6/59                 | 6.4 | 0.04    |
| Late onset sepsis                            | 8/64 (13%)           | 14/61 (23%)          | 1.8 | 0.07    |
| Death                                        | 3/64 (4.7%)          | 4 (6.6%)             | 1.4 | 0.65    |
| BPD                                          | 16/64 (25%)          | 18/61 (30%)          | 1.2 | 0.73    |
| NEC (Bells stage II or greater)              | 3/64 (4.7%)          | 3/61 (4.9%)          | 1.0 | 0.95    |
| NEC all stages                               | 3/64                 | 6/61                 | 2.1 | 0.27    |
| Feeds withheld 12 h (FW12h)                  | 17/64 (27%)          | 20/61 (23%)          | 1.6 | 0.19    |
| Positive morbidity index                     | 23/64 (36%)          | 30/61 (49%)          | 1.4 | 0.07    |
| <b>Sullivan RCT- subgroup reanalysis [3]</b> |                      |                      |     |         |
| Number of subjects                           | 82                   | 32                   |     |         |
| NEC (Bells Stage II or greater)              | 3/82 (3.7%)          | 5 (15.6%)            | 4.2 | 0.04    |
| NEC surgery or death                         | 3/82 (3.7%)          | 6/32 (18.8%)         | 5.1 | 0.01    |
| Death only                                   | 3/82 (3.7%)          | 4/32 (12.5%)         | 3.4 | 0.10    |
| Proven sepsis                                | 20/84 (29.3%)        | 11/32 (34.4%)        | 0.6 | 0.45    |
| BPD                                          | 24/84 (29.3%)        | 11/32 (34.4%)        | 1.2 | 0.60    |
| ROP (grade 3 or 4)                           | 6/84 (7.3%)          | 2/32 (6.3%)          | 0.9 | 1.0     |
| <b>Assad study- subgroup reanalysis [4]</b>  |                      |                      |     |         |
| Number of subjects                           | 87                   | 127                  |     |         |
| NEC (Bell stage II or greater)               | 1/87 (1.1%)          | 11/127 (8.7%)        | 7.5 | 0.02    |
| ROP                                          | 11/87 (14%)          | 40/127 (32%)         | 2.5 | 0.001   |
| BPD                                          | 13/87 (15%)          | 30/127 (24%)         | 1.6 | 0.20    |
| PDA                                          | 7/87 (8%)            | 28/127 (22%)         | 2.7 | 0.007   |
| Feeds withheld 24 h (FW24h)                  | 5/87 (6%)            | 43/127 (34%)         | 5.9 | 0.001   |
| Late-onset sepsis                            | 11/87 (13%)          | 20/127 (16%)         | 1.3 | 0.66    |

HM-HMF: Human milk with human milk fortifier; HM-BMF: Human milk with bovine milk fortifier; NEC: Necrotizing enterocolitis; BPD: Bronchopulmonary dysplasia; ROP: Retinopathy of prematurity.

## References

1. Bach Jensen, G.a.D., Magnus and Ahlsson, Fredrik and Elfvin, Anders and Naver, Lars and Abrahamsson, Thomas. Effect Of Human Milk-Based Fortification in Extremely Preterm Infants Fed Exclusively with Breast Milk: A Randomised Controlled Trial. Available at SSRN: . Available online: [https://papers.ssrn.com/sol3/papers.cfm?abstract\\_id=4529245](https://papers.ssrn.com/sol3/papers.cfm?abstract_id=4529245) (accessed on
2. O'Connor, D.L.; Kiss, A.; Tomlinson, C.; Bando, N.; Bayliss, A.; Campbell, D.M.; Daneman, A.; Francis, J.; Kotsopoulos, K.; Shah, P.S.; et al. Nutrient enrichment of human milk with human and bovine milk-based fortifiers for infants born weighing <1250 g: a randomized clinical trial. *Am J Clin Nutr* **2018**, *108*, 108-116, doi:10.1093/ajcn/nqy067.

3. Lucas, A.; Boscardin, J.; Abrams, S.A. Preterm Infants Fed Cow's Milk-Derived Fortifier Had Adverse Outcomes Despite a Base Diet of Only Mother's Own Milk. *Breastfeed Med* **2020**, *15*, 297-303, doi:10.1089/bfm.2019.0133.
4. Lucas, A.; Assad, M.; Sherman, J.; Boscardin, J.; Abrams, S. Safety of Cow's Milk-Derived Fortifiers Used with an All-Human Milk Base Diet in Very Low Birthweight Preterm Infants. *Neonatology Today* **2020**, *15*, 3-13, doi:10.51362/neonatology.today/20207157313.
